# Supplementary material for: Calibration of mercury analysers: assessment of agreement between four methods
Source: Royal Society of Chemistry journal article supplement (doi:10.1039/c2ay25533b), 2012-01-01
Supplement: c2ay25533b.pdf [file c2ay25533b.pdf]

Supplementary Material for

# Calibration of mercury analyzers: Assessment of agreement between four methods

*Youngchul Byun,<sup>a</sup> Dong Nam Shin,<sup>b,\*</sup> Sung-Won Ham,<sup>c</sup> Kyung Lee<sup>d</sup>*

<sup>a</sup>School of Chemical Engineering and Analytical Science, The University of Manchester

<sup>b</sup>Environmental Research Department, Research Institute of Industrial Science & Technology

<sup>c</sup>Department of Display & Chemical Engineering, Kyungil University

<sup>d</sup>DS Science Company

\*Corresponding author telephone: +82-54-279-6540; fax: +82-54-279-6239; e-mail: [jydnshin@rist.re.kr](mailto:jydnshin@rist.re.kr)

## Contents

| Contents | Title                                                                                                                 | Page |
|----------|-----------------------------------------------------------------------------------------------------------------------|------|
| Text     | Effect of gases passing through the mercury saturator                                                                 | S2   |
| Fig. S1  | Effect of gases passing through the mercury saturator on the generation of Hg <sup>0</sup> .                          | S3   |
| Text     | Effect of the water condensation unit on the Hg <sup>0</sup> signal                                                   | S4   |
| Fig. S2  | Effect of the water condensation unit on the Hg <sup>0</sup> signal when a mercury solution was used for calibration. | S4   |
| Text     | Illustration of Hg solution method                                                                                    | S5   |
| Fig. S3  | Output signal obtained from the use of Hg solution.                                                                   | S6   |
| Text     | Illustration of UV method using Beer's law                                                                            | S7   |
| Fig. S4  | Use of the absorption coefficient of Hg <sup>0</sup> at 253.7 nm light employing Beer's law.                          | S8   |
| Table S1 | Data obtained from the UV absorption coefficient method                                                               | S9   |
| Text     | Antonie, Wagner, and Dumarey equations                                                                                | S10  |
| Table S2 | Coefficients (a <sub>i</sub> ) and their standard deviations                                                          | S10  |
| Table S3 | Fixed parameters (T <sub>c</sub> and P <sub>c</sub> )                                                                 | S11  |

### **Effect of gases passing through the mercury saturator**

If the effluent  $\text{Hg}^0$  has been saturated at each temperature of the mercury saturator, the increase in the  $\text{Hg}^0$  signal in the mercury saturator must be stopped at 10 °C because the temperature of the condensation vessel was also set to 10 °C. This means that the mercury saturator cannot emit saturated  $\text{Hg}^0$  controlled by the temperature. This is believed to be caused by the gases passing through the mercury saturator. Therefore, this study examined the effect of the flow rate of gases passing through the mercury saturator on the  $\text{Hg}^0$  concentration. The temperature of the mercury saturator was set to 10 °C and the flow rates of  $\text{N}_2$  passing through the mercury saturator were increased from 10 to 300  $\text{mL min}^{-1}$ . Finally, it was diluted with  $\text{N}_2$ . The total flow rate was fixed to 2  $\text{L min}^{-1}$  (Fig. S1). If the flow rate cannot affect the saturation of  $\text{Hg}^0$  inside the mercury saturator, the data obtained must be the dashed line in Fig. S1. However, with increasing flow rate, a larger deviation can be found between the assumed and practical data. This means that the precise concentration of  $\text{Hg}^0$  is difficult to obtain with the gases passing continually through the mercury saturator. Therefore, two-stage mercury vapor control is essential for a steady injection of precise  $\text{Hg}^0$  for the method using the vapor pressure of mercury.

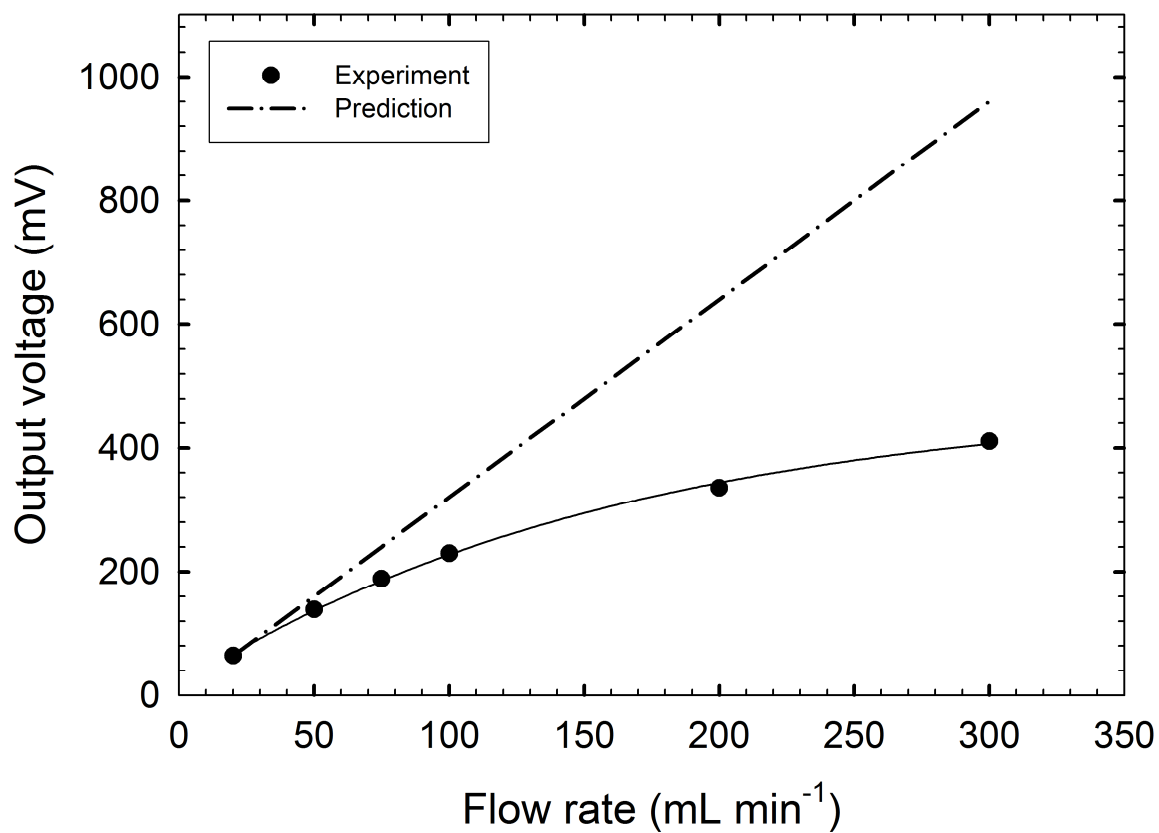

**Fig. S1.** Effect of gases passing through the mercury saturator on the generation of  $\text{Hg}^0$ .

Experimental conditions: temperature of mercury saturator = 10 °C, total flow rate (gases passing through the mercury saturator + dilution gases) = 2 L min<sup>-1</sup>. The dash line was calculated based on the  $\text{Hg}^0$  signal of 20 ml gases passing through the mercury saturator.

### Effect of the water condensation unit on the $\text{Hg}^0$ signal

The effect of the water condensation unit on the  $\text{Hg}^0$  signal was examined by initially introducing  $\text{Hg}^0$  in the  $\text{N}_2$  balance using a permeation tube into the moisture condensing unit without a water bubble and then turning the pass line of  $\text{Hg}^0$  into the impinger containing distilled water (Fig. S2). The results revealed little effect on the  $\text{Hg}^0$  concentration.

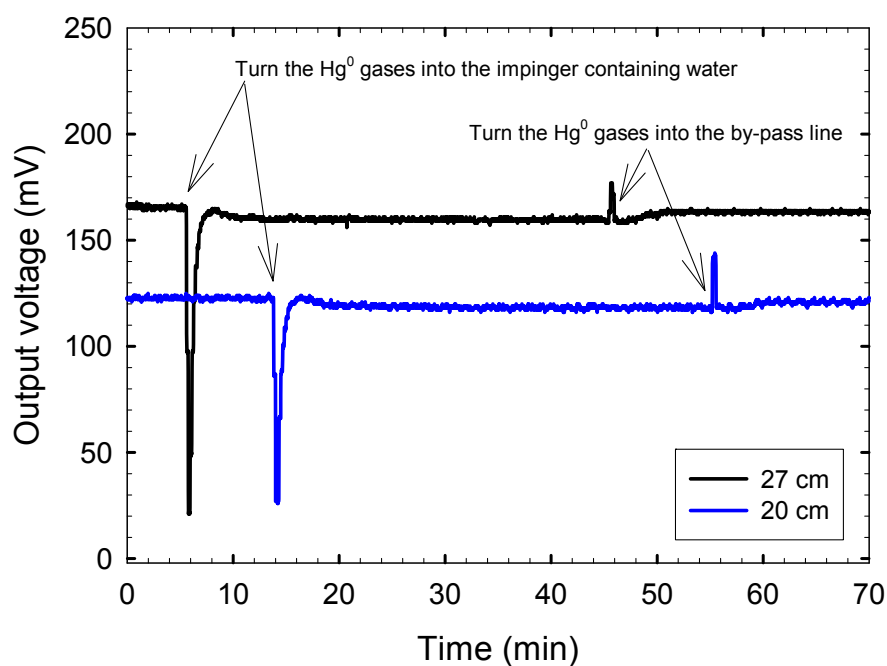

**Fig. S2.** Effect of the water condensation unit on the  $\text{Hg}^0$  signal when a mercury solution was used for calibration. Initially, only  $\text{N}_2$  containing  $\text{Hg}^0$  was introduced into the CVAAS via the moisture condensing unit. Subsequently, the gas flow was passed through the impinger containing mercury.

### **Illustration of Hg solution method**

Two parameters (flow rate of passing N<sub>2</sub> and the amount of Hg dissolved in water) were changed and the area of peak signal of Hg<sup>0</sup> was calculated. The area of the signal increased and decreased with increasing amount of the Hg contained in the solution and flow rate of aerated N<sub>2</sub>, respectively (Fig. S3).

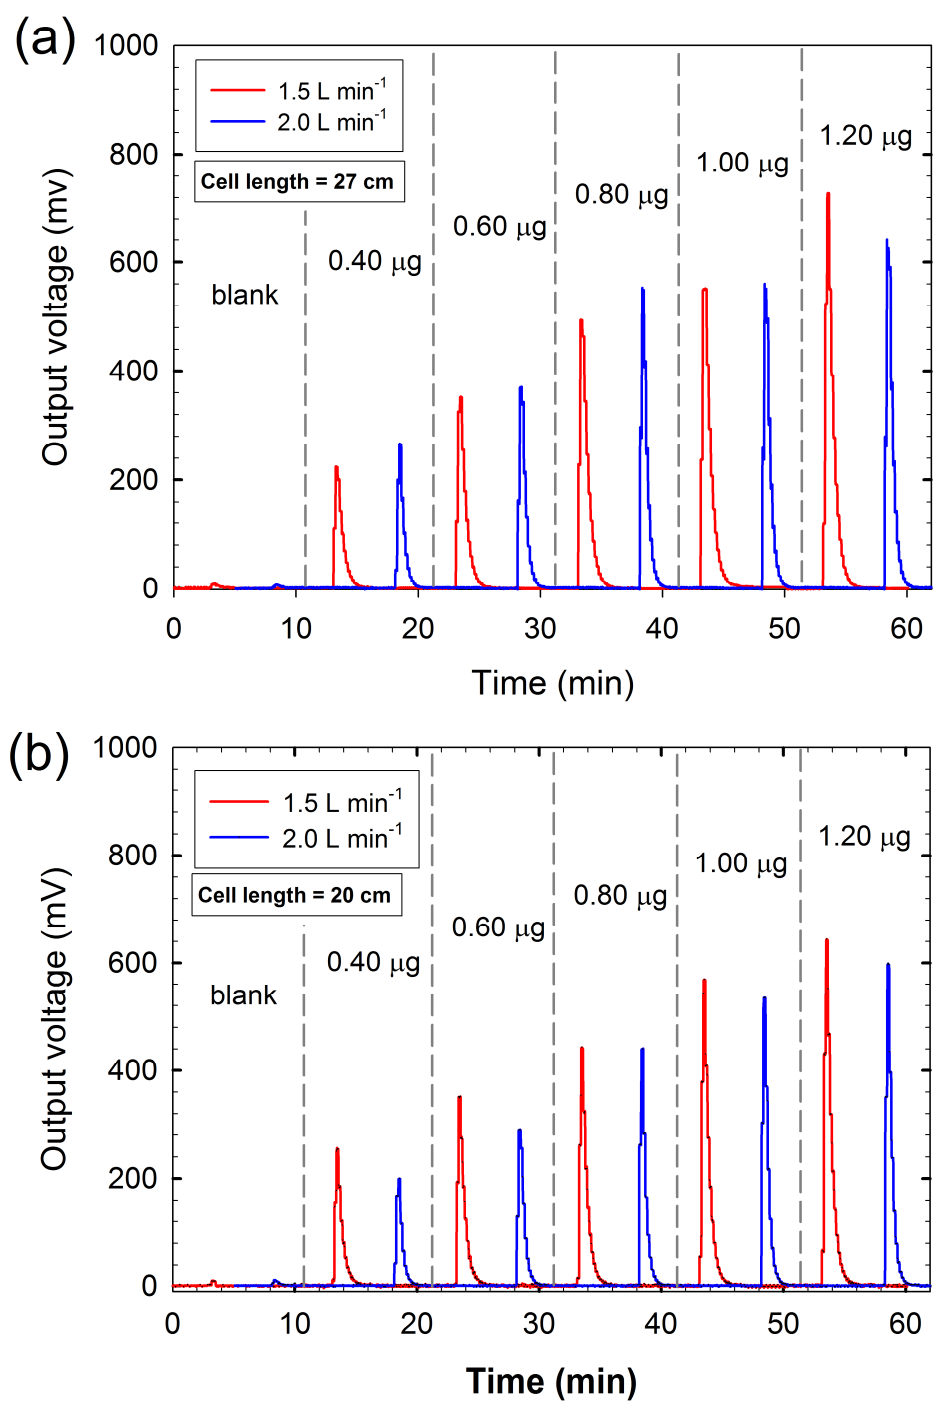

**Fig. S3.** Output signal obtained from the use of Hg solution. (a) 27 cm of the cell length.

(b) 20 cm of the cell length. The small peaks in blank originated from the traces of the used reagents.

### **Illustration of UV method using Beer's law**

Initially, the response of CVAAS as a function of the calculated  $\text{Hg}^0$  concentration using the permeation tube was obtained according to the cell length (Fig. S4(a)).  $\ln(I/I_0)$  (Fig. S4(b)) was calculated and redrawn as a function of the cell length of CVAAS (Fig. S4(c) of SI). At each fit in Fig. S4, the slope and deviation was obtained (Table S1). The slope of Fig. S4(c) is a function of the absorption coefficient and  $\text{Hg}^0$  ( $-kC_{\text{Hg}}$ ) concentration. Therefore, the  $\text{Hg}^0$  concentration was obtained using the absorption coefficient ( $k$ ) and slope. Finally, the concentration calculated from the slope of Fig. S4(c) was compared with the concentration calculated from the injected  $\text{Hg}^0$  using a permeation tube (Fig. S4(d)). Finally, using the ratio of the concentration calculated from the absorption coefficient to the permeation tube, the increment,  $\alpha_{\text{UV}}$ , was determined to be and 0.0868 and 0.0653 for 20 cm and 27 cm cells, respectively.

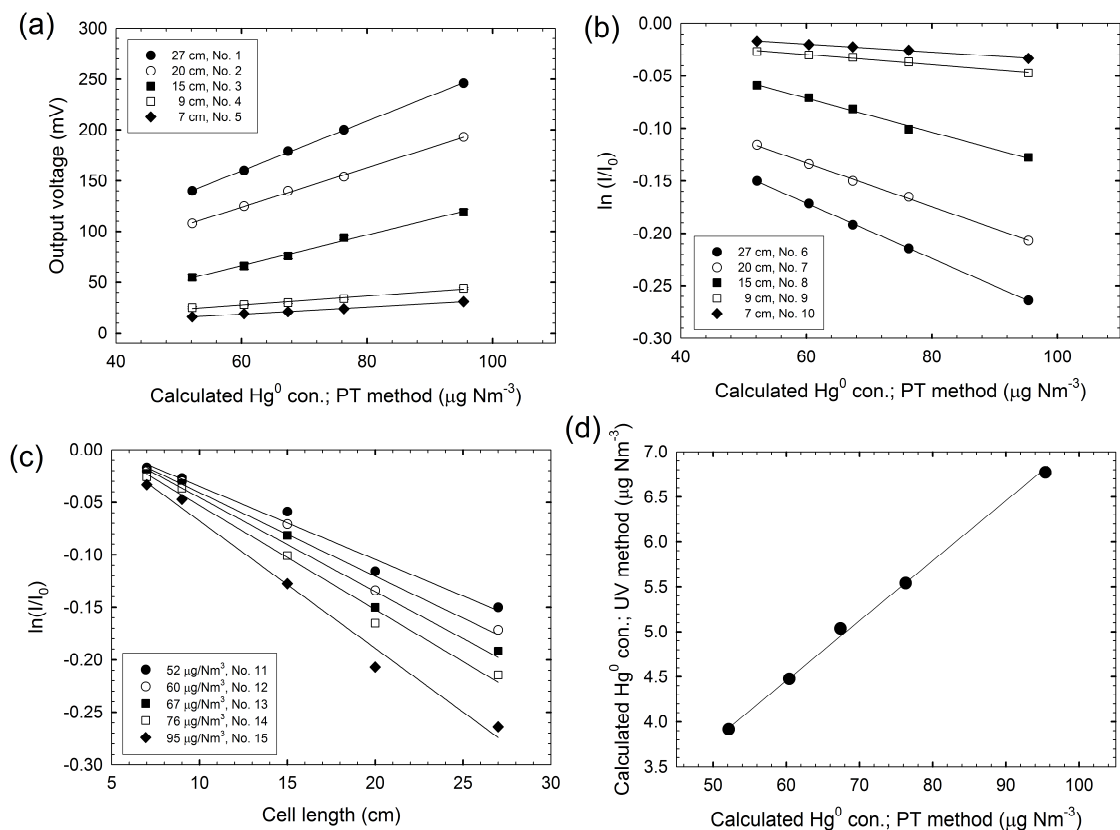

**Fig. S4.** Use of the absorption coefficient of  $\text{Hg}^0$  at 253.7 nm light employing Beer's law. (a) The output signal of the CVAAS as a function of the injected  $\text{Hg}^0$  concentration. The concentration of injected  $\text{Hg}^0$  was determined using a permeation tube. (b)  $\ln(I/I_0)$  converted from Fig. S4(a). (c) Redrawn graph using Fig. S4(b) as a function of the cell length. (d) Calculated  $\text{Hg}^0$  concentration as a function of the injected  $\text{Hg}^0$  concentration obtained the permeation tube.



**Table S1.** Data obtained from the UV absorption coefficient method

| Number | Fitted equation       | R <sup>2</sup> | Calculated Hg concentration<br>( $\mu\text{g Nm}^{-3}$ ) |
|--------|-----------------------|----------------|----------------------------------------------------------|
| No. 1  | $Y=2.4537x + 12.4312$ | 1.0000         | -                                                        |
| No. 2  | $Y=1.9455x + 7.1715$  | 0.9999         | -                                                        |
| No. 3  | $Y=1.5130x - 24.4086$ | 0.9996         | -                                                        |
| No. 4  | $Y=0.4408x + 1.1953$  | 0.9995         | -                                                        |
| No. 5  | $Y=0.3334x - 2.0222$  | 0.9999         | -                                                        |
| No. 6  | $Y=-0.0026x - 0.0133$ | 1.0000         | -                                                        |
| No. 7  | $Y=-0.0021x - 0.0077$ | 0.9999         | -                                                        |
| No. 8  | $Y=-0.0016x - 0.0262$ | 0.9996         | -                                                        |
| No. 9  | $Y=-0.0005x - 0.0013$ | 0.9995         | -                                                        |
| No. 10 | $Y=-0.0004x + 0.0022$ | 0.9999         | -                                                        |
| No. 11 | $Y=-0.0070x + 0.0349$ | 0.9935         | 3.9                                                      |
| No. 12 | $Y=-0.0080x + 0.0390$ | 0.9940         | 4.5                                                      |
| No. 13 | $Y=-0.0090x + 0.0441$ | 0.9945         | 5.0                                                      |
| No. 14 | $Y=-0.0099x + 0.0461$ | 0.9968         | 5.5                                                      |
| No. 15 | $Y=-0.0121x + 0.0536$ | 0.9962         | 6.8                                                      |

### Antonie, Wagner, and Dumarey equations

The Antonie equation is as follows,

$$\log P_{sat} [mmHg] = A - \frac{B}{T[K]},$$

where A is a constant equal to 7.871936 and B is a constant equal to 3143.28.

The Wagner equation is as follows,

$$\ln\left(\frac{P}{P_c}\right) = \left(\frac{T_c}{T}\right)(a_1\tau + a_2\tau^{1.89} + a_3\tau^2 + a_4\tau^8 + a_5\tau^{8.5} + a_6\tau^9), \quad \tau = 1 - \frac{T}{T_c},$$

where coefficients ( $a_i$ ) and their standard deviations are given in Table S2 and fixed parameters ( $T_c$  and  $P_c$ ) are given in Table S3.

---

**Table S2.** Coefficients ( $a_i$ ) and their standard deviations

---

| i | $a_i$       | Std.dev. |
|---|-------------|----------|
| 1 | -4.57618368 | 0.0472   |
| 2 | -1.40726277 | 0.8448   |
| 3 | 2.36263541  | 0.8204   |
| 4 | -31.0889985 | 1.3439   |
| 5 | 58.0183959  | 2.4999   |
| 6 | -27.6304546 | 1.1798   |

---

---

**Table S3.** Fixed parameters ( $T_c$  and  $P_c$ )

---

| $T_c$ (K) | $P_c$ (MPa) |
|-----------|-------------|
| 1764      | 167         |

---

The Dumarey equation is as follows,

$$\gamma_{Hg} = \frac{D}{T} 10^{-(A + [B/T])},$$

where  $\gamma_{Hg}$  is the mass concentration of saturated mercury in the air inside the calibration vessel, in  $\text{ng ml}^{-1}$ ,  $T$  is the temperature of the air inside the calibration vessel, in K,  $A$  is a constant equal to  $-8.134459741$ ,  $B$  is a constant equal to  $3240.871534$  K, and  $D$  is a constant equal to  $3216522.61$  K  $\text{ng ml}^{-1}$ .
